# Supplementary material for: Cockayne Syndrome: Varied Requirement of Transcription-Coupled Nucleotide Excision Repair for the Removal of Three Structurally Different Adducts from Transcribed DNA
Source: PubMed Central journal article supplement (PMC3979923; doi:10.1371/journal.pone.0094405), 2014-04-08
Supplement: pone.0094405.s002.pdf [file pone.0094405.s002.pdf]

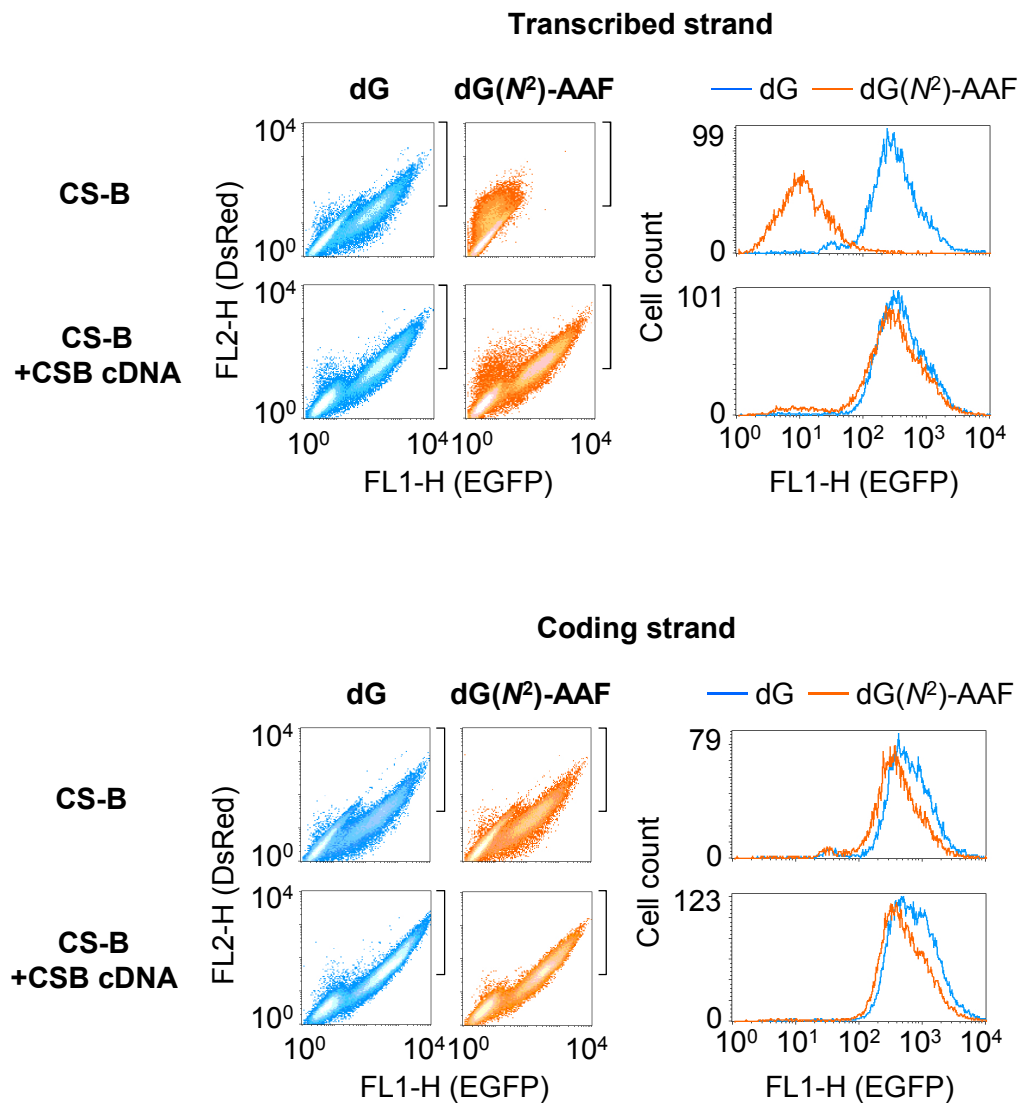

**Supporting Figure 2. Host cell reactivation of the EGFP expression in the CS-B cell line and the isogenic cell line corrected by expression of the CSB cDNA.** Transfected constructs contained a unique  $dG(N^2)$ -AAF in either the transcribed or non-transcribed (coding) strand of the EGFP gene, as indicated. Extended data for the experiment shown in Figure 2a.
