# Supplementary material for: Cockayne Syndrome: Varied Requirement of Transcription-Coupled Nucleotide Excision Repair for the Removal of Three Structurally Different Adducts from Transcribed DNA
Source: PubMed Central journal article supplement (PMC3979923; doi:10.1371/journal.pone.0094405), 2014-04-08
Supplement: pone.0094405.s003.pdf [file pone.0094405.s003.pdf]

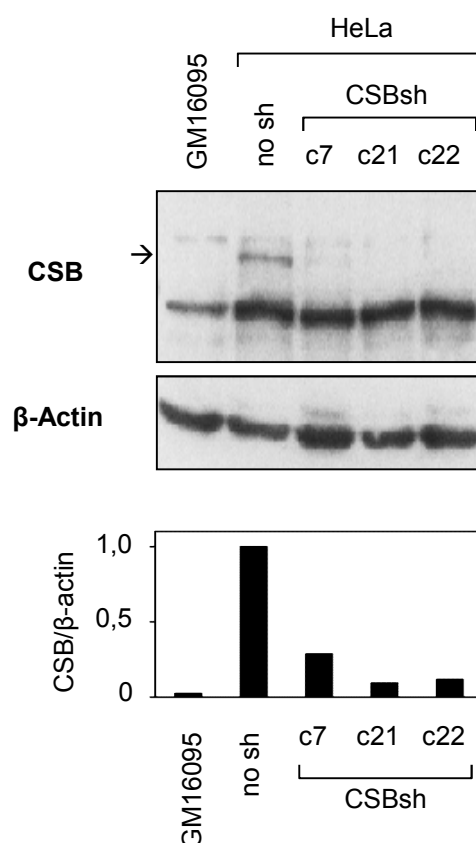

**Supporting Figure 3. Stable knockdown of the endogenous CSB expression in HeLa cells.** Single clones were selected following transfections with empty vector (no sh) or the vector expressing the shRNA designed to target the *CSB* gene (CSBsh, three different clones) and analyzed by Western blot. Of the two bands recognized by the CSB antibody, one corresponds to the full-length CSB protein (arrow). This band is absent in the extracts obtained from the CS-B cell line (GM16095).
