# Supplementary material for: Cockayne Syndrome: Varied Requirement of Transcription-Coupled Nucleotide Excision Repair for the Removal of Three Structurally Different Adducts from Transcribed DNA
Source: PubMed Central journal article supplement (PMC3979923; doi:10.1371/journal.pone.0094405), 2014-04-08
Supplement: pone.0094405.s004.pdf [file pone.0094405.s004.pdf]

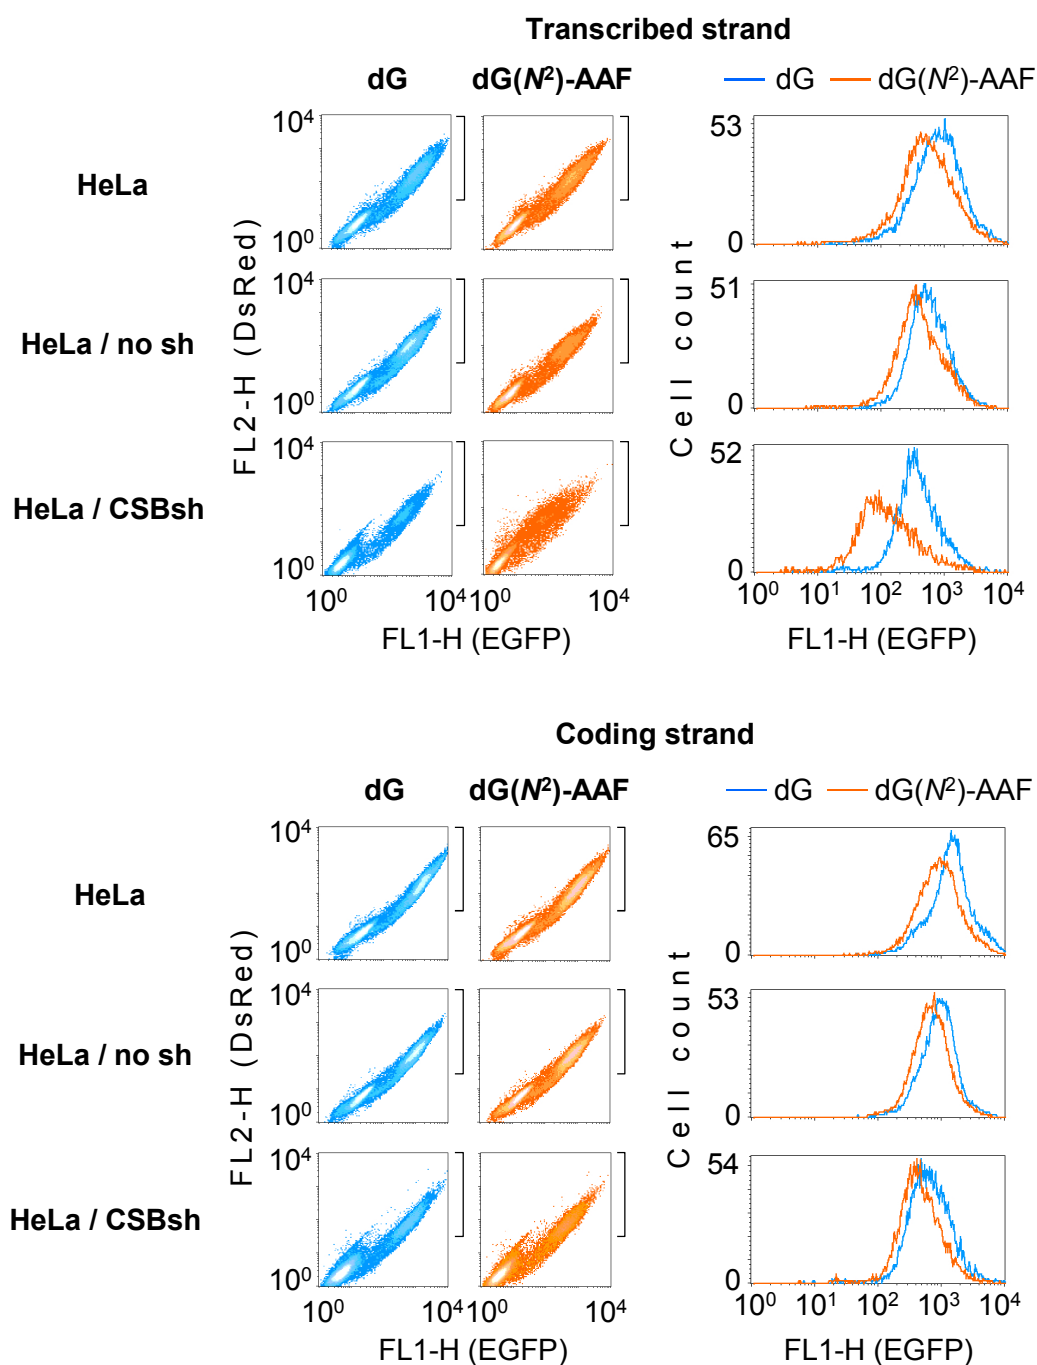

**Supporting Figure 4. Host cell reactivation of the EGFP expression in HeLa cells and the derived cell lines with different CSB expression statuses.** Clonal cell lines stably transfected with empty vector (no sh) or the vector expressing the CSB-specific shRNA (CSBsh, clone 21) were transfected with constructs containing a unique dG( $N^2$ )-AAF in either the transcribed or non-transcribed (coding) strand of the EGFP gene, as indicated. Extended data for the experiment shown in Figure 2b.
